# Supplementary material
Source: PubMed Central journal article supplement (PMC3341089)
Supplement: NIHMS47900-supplement-Suppl_.pdf [file NIHMS47900-supplement-Suppl_.pdf]

**Supp. Figure S1.** Alignment of the H1 hybrid allele sequences of carriers Ci, Cii and Ciii with the human and chimpanzee gene and pseudogene. The Alignment starts at Primer LRPCR4\_Fwd and comprises 2718 bp. Parologue and orthologue discriminating SNPs are highlighted in red and blue, respectively. Those mentioned in Supp. Table S3 are indicated with their names. Pairs of differences involving neither homologues nor paralogues are highlighted in green. SNPs divergent from any of the reference sequences found in this or other H1 sub-haplotypes are encircled and indicated with their names (see Supp. Table S3).

|         |                                              |             |
|---------|----------------------------------------------|-------------|
|         | <b>PDS2</b>                                  | <b>PDS3</b> |
| Hs_PMS2 | AAATTAGTCAGACTTGATGGTGTGTG                   |             |
| Hs_PSD  | AAATTAGTCAGACTT <b>C</b> ATGGTGT <b>A</b> TG |             |
| Pt_PMS2 | AAATTAGTCAGACTTGATGGTGTGTG                   |             |
| Pt_PSD  | AAATTAGTCAGACTT <b>C</b> ATGGTGT <b>A</b> TG |             |
| Ci      | -----                                        |             |
| Cii     | -----                                        |             |
| Ciii    | -----                                        |             |

|         |                                                                                |
|---------|--------------------------------------------------------------------------------|
| Hs_PMS2 | CCTGTGGTCCCAGCTATTCGGGAGGCTGAGGTGGGAGGATCGTTT <b>G</b> AGCCCAGGAGATTG          |
| Hs_PSD  | CCTGTGGTCCCAGCTATTCGGGAGGCTGAGGTGGGAGGATCGTTT <b>G</b> AGCCCAGGAGATTG          |
| Pt_PMS2 | CCTGTGGTCCCAGCTATTCGGGAGGCTGAGGTGGGAGGATCGTTT <b>G</b> AGCCCAGGAGATTG          |
| Pt_PSD  | CCTGTGGTCCCAGCTATTCGG <b>A</b> AGGCTGAGGTGGGAGGATCGTT-GA <b>A</b> CCCAGGAGAT-G |
| Ci      | -----CCAGCTATTCGGGAGGCTGAGGTGGGAGGATCGTTT <b>G</b> AGCCCAGGAGATTG              |
| Cii     | ----GTGGTCCAGCTATTCGGGAGGCTGAGGTGGGAGGATCGTTT <b>G</b> AGCCCAGGAGATTG          |
| Ciii    | -----CCAGCTATTCGGGAGGCTGAGGTGGGAGGATCGTTT <b>G</b> AGCCCAGGAGATTG              |

|         |                                                                     |
|---------|---------------------------------------------------------------------|
| Hs_PMS2 | AGGCTGCCATGATCGTGCCACTGCACAGCTCTCCAGCCTGGGTGACAGAGTGAGACAGTG        |
| Hs_PSD  | AGGCTGCCATGATCGTGCCACTGCACAGCTCTCCAGCCTGGGTGACAGAGTGAGACAGTG        |
| Pt_PMS2 | AGGCTGCCATGATCGTGCCACTGCACAGCTCTCCAGCCTGGGTGACAGAGTGAGACAGTG        |
| Pt_PSD  | AGGCTGCCATGATNNNNNNNNNNNNNNNNNNNNNNNNNNNNNNNNNNNNNNNNNNNNNNNNNNNNNN |
| Ci      | AGGCTGCCATGATCGTGCCACTGCACAGCTCTCCAGCCTGGGTGACAGAGTGAGACAGTG        |
| Cii     | AGGCTGCCATGATCGTGCCACTGCACAGCTCTCCAGCCTGGGTGACAGAGTGAGACAGTG        |
| Ciii    | AGGCTGCCATGATCGTGCCACTGCACAGCTCTCCAGCCTGGGTGACAGAGTGAGACAGTG        |

|         |                                                                         |
|---------|-------------------------------------------------------------------------|
| Hs_PMS2 | AGACTCTGTCTCACAAATAAAATTAATAAAATAAAATAAAATAAAAT-----TTAAAAATTA          |
| Hs_PSD  | AGACTCTGTCTCACAAATAAAATTAATAAAATAAAATAAAATAAAAT-----TTAAAAATTA          |
| Pt_PMS2 | AGACTCTGTCTCACAAATAAAATTAATAAAATAAAATAAAATAAAATAAAATTTAAAAATTA          |
| Pt_PSD  | NNNNNNNNNNNNNNNNNNNNNNNNNNNNNNNNNNNNNNNNNNNNNNNNNNNNNNNNNNNNNN          |
| Ci      | AGACTCTGTCTCACAAATAAAATTAATAAAATAAA <b>C</b> AAAAATAAAAT-----TTAAAAATTA |
| Cii     | AGACTCTGTCTCACAAATAAAATTAATAAAATAAA <b>C</b> AAAAATAAAAT-----TTAAAAATTA |
| Ciii    | AGACTCTGTCTCACAAATAAAATTAATAAAATAAA <b>C</b> AAAAATAAAAT-----TTAAAAATTA |

|         |                                                                       |
|---------|-----------------------------------------------------------------------|
|         | <b>PDSi</b>                                                           |
| Hs_PMS2 | TTTTAAGATAGTCACTGCAGAATTTGGTATTTCTCTCTCCTCGGCCAA <b>A</b> CTGGAATGTTT |
| Hs_PSD  | TTTTAAGATAGTCACTGCAGAATTTGGTATTTCTCTCTCCTCGGCCAA <b>A</b> CTGGAATGTTT |
| Pt_PMS2 | TTTTAAGATAGTCACTGCAGAATTTGGTATTTCTCTCTCCTCGGCCAA <b>A</b> CTGGAATGTTT |
| Pt_PSD  | -----                                                                 |
| Ci      | TTTTAAGATAGTCACTGCAGAATTTGGTATTTCTCTCTCCTCGGCCAA <b>A</b> CTGGAATGTTT |
| Cii     | TTTTAAGATAGTCACTGCAGAATTTGGTATTTCTCTCTCCTCGGCCAA <b>A</b> CTGGAATGTTT |
| Ciii    | TTTTAAGATAGTCACTGCAGAATTTGGTATTTCTCTCTCCTCGGCCAA <b>A</b> CTGGAATGTTT |

|         |                                                                              |               |
|---------|------------------------------------------------------------------------------|---------------|
|         | <b>PDSii</b>                                                                 | <b>PDSiii</b> |
| Hs_PMS2 | TACCC-TGACTACTTCACAAAGGTCAGGTGTGATAGTATCATGTAAAACCAAAGTCTTGT                 |               |
| Hs_PSD  | TAC <b>C</b> -TGACTACTTCACAAAGGTCAG <b>C</b> GTGATAGTATCATGTAAAACCAAAGTCTTGT |               |
| Pt_PMS2 | TACCCCTGACTACTTCACAAAGGTCAGGTGTGATAGTATCATGTAAAACCAAAGTCTTGT                 |               |
| Pt_PSD  | -----GTCTTGT                                                                 |               |
| Ci      | TACCC-TGACTACTTCACAAAGGTCAGGTGTGATAGTATCATGTAAAACCAAAGTCTTGT                 |               |

Cii TACCC-TGACTACTTCACAAAGGTCAGGTGTGATAGTATCATGTAAAACCAAAGTCTTGT  
 Ciii TACCC-TGACTACTTCACAAAGGTCAGGTGTGATAGTATCATGTAAAACCAAAGTCTTGT

|         | <b>PDSiv</b>                                                      | <b>PDSv</b> |
|---------|-------------------------------------------------------------------|-------------|
| Hs_PMS2 | CTTCAGCAAAGTTAGAAAGAAGAGGTCATGGATTTTCGTGTGGGAAATTA AACCCACGTAGT   |             |
| Hs_PSD  | CTTCAGCAAAGTTA AAGAAGAGGTCATGGATTTTCGTGTGGGAAATTA AAC CACGTAGT    |             |
| Pt_PMS2 | CTTCAGCAAAGTTATAAAGAAGAGGTCATGGATTTTCGTGTGGGAAATTA AACCCACGTAGT   |             |
| Pt_PSD  | CTTCAGCAAAGTTATAAAGAAGAGGTCATGGATTTTC A TGTGGGAAATTA AACCCACGTAGT |             |
| Ci      | CTTCAGCAAAGTTAGAAAGAAGAGGTCATGGATTTTCGTGTGGGAAATTA AACCCACGTAGT   |             |
| Cii     | CTTCAGCAAAGTTAGAAAGAAGAGGTCATGGATTTTCGTGTGGGAAATTA AACCCACGTAGT   |             |
| Ciii    | CTTCAGCAAAGTTAGAAAGAAGAGGTCATGGATTTTCGTGTGGGAAATTA AACCCACGTAGT   |             |

|         |                                                                |
|---------|----------------------------------------------------------------|
| Hs_PMS2 | GAAGTAAACTCAGATCCCAACAAGTAGATCCCACATGGAGAAATGTACC ACTGAACCTGT  |
| Hs_PSD  | GAAGTAAACTCAGATCCCAACAAGTAGATCCCACATGGAGAAATGTACC ACTGAACCTGT  |
| Pt_PMS2 | GAAGTAAACTCAGATCCCAACAAG CAGATCCCACATGGAGAAATGTACC ACTGAACCTGT |
| Pt_PSD  | GAAGTAAACTCAGATCCC GACAAGTAGATCCCACATGGAGAAATGTACC ACTGAACCTGT |
| Ci      | GAAGTAAACTCAGATCCCAACAAGTAGATCCCACATGGAGAAATGTACC ACTGAACCTGT  |
| Cii     | GAAGTAAACTCAGATCCCAACAAGTAGATCCCACATGGAGAAATGTACC ACTGAACCTGT  |
| Ciii    | GAAGTAAACTCAGATCCCAACAAGTAGATCCCACATGGAGAAATGTACC ACTGAACCTGT  |

|         | <b>ODS1</b>                                                    | <b>PDSvi</b> | <b>PDSvii</b> |
|---------|----------------------------------------------------------------|--------------|---------------|
| Hs_PMS2 | GTAGTTTGCCTGAGTACTCTCCTGTGTAGTTTACTGAGTACTCTCCTGTGTAGTTTGCCTGA |              |               |
| Hs_PSD  | GTAGTTTGCCTGAGTACTCTCCTGTGTAGTTT CTGAGTACTCTCCTGTGTAGTTT CTGA  |              |               |
| Pt_PMS2 | GTAGTTTACTGAGTACTCTCCTGTGTAGTTTGCCTGAGTACTCTCCTGTGTAGTTTGCCTGA |              |               |
| Pt_PSD  | GTAGTTTACTGAGTACTCTCCTGTGTAGTTTGCCTGAGTACTCTCCTGTGTAGTTTGCCTGA |              |               |
| Ci      | GTAGTTTACTGAGTACTCTCCTGTGTAGTTTACTGAGTACTCTCCTGTGTAGTTTGCCTGA  |              |               |
| Cii     | GTAGTTTACTGAGTACTCTCCTGTGTAGTTTACTGAGTACTCTCCTGTGTAGTTTGCCTGA  |              |               |
| Ciii    | GTAGTTTACTGAGTACTCTCCTGTGTAGTTTACTGAGTACTCTCCTGTGTAGTTTGCCTGA  |              |               |

|         |                                                                |
|---------|----------------------------------------------------------------|
| Hs_PMS2 | GTACTCTCCTGTGTAGTTTGCCTGAGTACTCTCCTGTG-----                    |
| Hs_PSD  | GTACTCTCCTGTGTAGTTTGCCTGAGTACTCTCCTGTGTAGTTTACTGAGTACTCTCCTGT  |
| Pt_PMS2 | GTACTCTCCTGTGTAGTTTGCCTGAGTACTCTCCTGTGTAGTTTGCCTGAGTGCTCTCCTGT |
| Pt_PSD  | GTACTCTCCTGTGTAGTTTGCCTGAGTACTCTCCTGTGTAGTTTGCCTGAGTACTCTCCTGT |
| Ci      | GTACTCTCCTGTGTAGTTTGCCTGAGTACTCTCCTGTG-----                    |
| Ci      | GTACTCTCCTGTGTAGTTTGCCTGAGTACTCTCCTGTG-----                    |
| Cii     | GTACTCTCCTGTGTAGTTTGCCTGAGTACTCTCCTGTG-----                    |

|         |                                                                 |
|---------|-----------------------------------------------------------------|
| Hs_PMS2 | -----                                                           |
| Hs_PSD  | GTAGTTTGCCTGAGTACTCTCCTGTGTAGTTTGCCTGAGTACTCTCCTGTGTAGTTTGCCTGA |
| Pt_PMS2 | GTAGTTTGCCTGAGTACTCTCCTGTGTAGTTTGCCTGAGTACTCTCCTGTG-----        |
| Pt_PSD  | GTAGTTTGCCTGAGTACTCTCCTGTGTAGTTTGCCTGAGTACTCTCCTGTGTAGTTTGCCTGA |
| Ci      | -----                                                           |
| Cii     | -----                                                           |
| Ciii    | -----                                                           |

|         |                                                                |
|---------|----------------------------------------------------------------|
| Hs_PMS2 | -----                                                          |
| Hs_PSD  | GTACTCTCCTGTG-----                                             |
| Pt_PMS2 | -----                                                          |
| Pt_PSD  | GTACTCTCCTGTGTAGTTTGCCTGAGTACTCTACTGTGTAGTTTGCCTGAGTACTCTCCTGT |
| Ci      | -----                                                          |
| Cii     | -----                                                          |
| Ciii    | -----                                                          |

Hs\_PMS2 -----GAATGCGTGAATTGTTTTTATTCTCAGTAGGAGGC  
 Hs\_PSD -----GAATGCGTGAATTGTTTTTATTCTCAGTAGGAGGC  
 Pt\_PMS2 -----GAATGCGTGAATTGTTTTTATTCTCAGTAGGAGGC  
 Pt\_PSD GTAGTTTGCTGAGTACTCTCCTGTGGAATGCGTGAATTGTTTTTATTCTCAGTAGGAGGC  
 Ci -----GAATGCGTGAATTGTTTTTATTCTCAGTAGGAGGC  
 Cii -----GAATGCGTGAATTGTTTTTATTCTCAGTAGGAGGC  
 Ciii -----GAATGCGTGAATTGTTTTTATTCTCAGTAGGAGGC

Hs\_PMS2 AATGGTAATAATAGACATTTAGTAAGCTACTTTATATCCCTTCCCTGTTCCCTCTTAATAG  
 Hs\_PSD AATGGTAATAATAGACATTTAGTAAGCTACTTTATATCCCTTCCCTGTTCCCTCTTAATAG  
 Pt\_PMS2 AATGGTAATAATAGACATTTAGTAAGCTACTTTATATCCCTTCCCTGTTCCCTCTTAATAG  
 Pt\_PSD AATGGTAATAATAGACATTTAGTAAGCTACTTTATATCCCTTCCCTGTTCCCTCTTAATAG  
 Ci AATGGTAATAATAGACATTTAGTAAGCTACTTTATATCCCTTCCCTGTTCCCTCTTAATAG  
 Cii AATGGTAATAATAGACATTTAGTAAGCTACTTTATATCCCTTCCCTGTTCCCTCTTAATAG  
 Ciii AATGGTAATAATAGACATTTAGTAAGCTACTTTATATCCCTTCCCTGTTCCCTCTTAATAG

Hs\_PMS2 AGGTTTTTTGTTTTTGTGTTTTTGAGACAGAGTTTCACTCTTTTCGCCATACTGGAGTGC  
 Hs\_PSD AGGTTTTTTGTTTTTGTGTTTTTGAGACAGAGTTTCACTCTTTTCGCCATACTGGAGTGC  
 Pt\_PMS2 AGGTTTTTTGTTTTTGTGTTTTTGAGACAGAGTTTCACTCTTTTCGCCATACTGGAGTGC  
 Pt\_PSD AGGTTTTTTGTTTTTGTGTTTTTGAGACAGAGTTTCACTCTTTTCGCCATACTGGAGTGC  
 Ci AGGTTTTTTGTTTTTGTGTTTTTGAGACAGAGTTTCACTCTTTTCGCCATACTGGAGTGC  
 cii AGGTTTTTTGTTTTTGTGTTTTTGAGACAGAGTTTCACTCTTTTCGCCATACTGGAGTGC  
 Ciii AGGTTTTTTGTTTTTGTGTTTTTGAGACAGAGTTTCACTCTTTTCGCCATACTGGAGTGC

Hs\_PMS2 AGTGATGTGATCTCGGCTTACTGCAACCTCTGCCTCTCGGGTTCAAGTGATTCTCCTGCC  
 Hs\_PSD AGTGATGTGATCTCGGCTTACTGCAACCTCTGCCTCTCGGGTTCAAGTGATTCTCCTGCC  
 Pt\_PMS2 AGTGATGTGATCTCGGCTTACTGCAACCTCTGCCTCTCGGGTTCAAGTGATTCTCCTGCC  
 Pt\_PSD AGTGATGTGATCTCGGCTTACTGCAACCTCTGCCTCTCGGGTTCAAGTGATTCTCCTGCC  
 Ci AGTGATGTGATCTCGGCTTACTGCAACCTCTGCCTCTCGGGTTCAAGTGATTCTCCTGCC  
 Cii AGTGATGTGATCTCGGCTTACTGCAACCTCTGCCTCTCGGGTTCAAGTGATTCTCCTGCC  
 Ciii AGTGATGTGATCTCGGCTTACTGCAACCTCTGCCTCTCGGGTTCAAGTGATTCTCCTGCC

Hs\_PMS2 TCAGCTCCCGAGTAGCTGGGATTACAGGCACCCGCCACCACACCTGGCTAATTTTTGGA  
 Hs\_PSD TCAGCTCCCGAGTAGCTGGGATTACAGGCACCCGCCACCACACCTGGCTAATTTTTGGA  
 Pt\_PMS2 TCAGCTCCCGAGTAGCTGGGATTACAGGCACCCGCCACCACACCTGGCTAATTTTTGGA  
 Pt\_PSD TCAGCTCCCGAGTAGCTGGGATTACAGGCACCCGCCACCACACCTGGCTAATTTTTGGA  
 Ci TCAGCTCCCGAGTAGCTGGGATTACAGGCACCCGCCACCACACCTGGCTAATTTTTGGA  
 Cii TCAGCTCCCGAGTAGCTGGGATTACAGGCACCCGCCACCACACCTGGCTAATTTTTGGA  
 Ciii TCAGCTCCCGAGTAGCTGGGATTACAGGCACCCGCCACCACACCTGGCTAATTTTTGGA

Hs\_PMS2 TTTTTAATAGATAGGGAGTTTTGCC-ATGTTTGTGTCAGGCTGGTCTTGAACCTCCTGACCTC  
 Pt\_PMS2 TTTTTAATAGATAGGGAGTTTTGCC-ATGTTTGTGTCAGGCTGGTCTTGAACCTCCTGACCTC  
 Hs\_PSD TTTTTAATAGATAGGGAGTTTTGCC-ATGTTTGTGTCAGGCTGGTCTTGAACCTCCTGACCTC  
 Pt\_PSD TTTTTAATAGATAGGGAGTTTTGCC-ATGTTTGTGTCAGGCTGGTCTTGAACCTCCTGACCTC  
 Ci TTTTTAATAGATAGGGAGTTTTGCC-ATGTTTGTGTCAGGCTGGTCTTGAACCTCCTGACCTC  
 Cii TTTTTAATAGATAGGGAGTTTTGCC-ATGTTTGTGTCAGGCTGGTCTTGAACCTCCTGACCTC  
 Ciii TTTTTAATAGATAGGGAGTTTTGCC-ATGTTTGTGTCAGGCTGGTCTTGAACCTCCTGACCTC

**PDS4**

Hs\_PMS2 AGGTGATCCACCAACCTCAGCTCCCAAAGTGCTGGGATTACAGGTGTGAGCCACCATGC  
 Hs\_PSD AGGTGATCCACCAACCTCAGCTCCCAAAGTGCTGGGATTACAGGTGTGAGCCACCATGC  
 Pt\_PMS2 AGGTGATCCACCAACCTCAGCTCCCAAAGTGCTGGGATTACAGGTGTGAGCCACCATGC  
 Pt\_PSD AGGTGATCCACCAACCTCAGCTCCCAAAGTGCTGGGATTACAGGTGTGAGCCACCATGC

Ci AGGTGATCCACCAACCTCAGCCTCCCAAAGTGCTGGGATTACAGGCGTGAGCCACCATGC  
 Cii AGGTGATCCACCAACCTCAGCCTCCCAAAGTGCTGGGATTACAGGCGTGAGCCACCATGC  
 Ciii AGGTGATCCACCAACCTCAGCCTCCCAAAGTGCTGGGATTACAGGCGTGAGCCACCATGC

**SNP1****ODS2**

Hs\_PMS2 CCGGCTGAGGTCTTGTATTTTTTAGCCATTCGGCAAAGATAACCTCTCATCTGTGACATT  
 Hs\_PSD CCGGCTGAGGTCTTGTATTTTTTAGCCATTCGGCAAAGATAACCTCTCATCTGTGACATT  
 Pt\_PMS2 CCGGCTGAGGTCTTGTATTTTTTAGCCATTCGGCAAAGATAACCTCTCATCTGTGACATT  
 Pt\_PSD CTTGGCTGAGGTCTTGTATTTTTTAGCCATTCGGCAAAGATAACCTCTCATCTGTGACATT  
 Ci CTTGGCTGAGGTCTTGTATTTTTTAGCCATTCGGCAAAGATAACCTCTCATCTGTGACATT  
 Cii CTTGGCTGAGGTCTTGTATTTTTTAGCCATTCGGCAAAGATAACCTCTCATCTGTGACATT  
 Ciii CTTGGCTGAGGTCTTGTATTTTTTAGCCATTCGGCAAAGATAACCTCTCATCTGTGACATT

Hs\_PMS2 TCAAGTTGGCCCAGGTAATCACAGACCACCTTAGGGTCCCAGATGGACCACACTTCAAGAT  
 Hs\_PSD TCAAGTTGGCCCAGGTAATCACAGACCACCTTAGGGTCCCAGATGGACCACACTTCAAGAT  
 Pt\_PMS2 TCAAGTTGGCCCAGGTAATCACAGACCACCTTAGGGTCTCAGATGGACCACACTTCAAGAT  
 Pt\_PSD TCAAGTTGGCCCAGGTAATCACAGACCACCTTAGGGTCCCAGATGGACCACACTTCAAGAT  
 Ci TCAAGTTGGCCCAGGTAATCACAGACCACCTTAGGGTCCCAGATGGACCACACTTCAAGAT  
 Cii TCAAGTTGGCCCAGGTAATCACAGACCACCTTAGGGTCCCAGATGGACCACACTTCAAGAT  
 Ciii TCAAGTTGGCCCAGGTAATCACAGACCACCTTAGGGTCCCAGATGGACCACACTTCAAGAT

Hs\_PMS2 TAAAGGATAAAGACCCAGTTCACCCTGCCCTGCCAGCCCCCTGTGTAGGGTGGCCCTGTT  
 Hs\_PSD TAAAGGATAAAGACCCAGTTCACCCTGCCCTGCCAGCCCCCTGTGTAGGGTGGCCCTGTT  
 Pt\_PMS2 TAAAGGATCAAGACCCAGTTCACCCTGCCCTGCCAGCCCCCTGTGTAGGGTGGCCCTGTT  
 Pt\_PSD GAAAGGATCAAGACCCAGTTCACCCTGCCCTGCCAGCCCCCTGTGTAGGGTGGCCCTGTT  
 Ci TAAAGGATAAAGACCCAGTTCACCCTGCCCTGCCAGCCCCCTGTGTAGGGTGGCCCTGTT  
 Cii TAAAGGATAAAGACCCAGTTCACCCTGCCCTGCCAGCCCCCTGTGTAGGGTGGCCCTGTT  
 Ciii TAAAGGATAAAGACCCAGTTCACCCTGCCCTGCCAGCCCCCTGTGTAGGGTGGCCCTGTT

Hs\_PMS2 GACCTCTGTAGCTTTTTCCCGTTCGTCTTCCCCTTGTTCCTGTACTCAA-GCCTCT--CT  
 Hs\_PSD GACCTCTGTAGCTTTTTCCCGTTCGTCTTCCCCTTGTTCCTGTACTCAA-GCCTCT--CT  
 Pt\_PMS2 GGCCTCTGTAGCTTTTTCCCTGTTCACTTCCCCTTGTTCCTGTACTCAAAGCCTCTGGCT  
 Pt\_PSD GAC-TCTGTAGCTTTTTCCCGTTCGTCTTCCCCTTGTTCCTGTACTCAA-GCCTCT--CT  
 Ci GACCTCTGTAGCTTTTTCCCGTTCGTCTTCCCCTTGTTCCTGTACTCAA-GCCTCT--CT  
 Cii GACCTCTGTAGCTTTTTCCCGTTCGTCTTCCCCTTGTTCCTGTACTCAA-GCCTCT--CT  
 Ciii GACCTCTGTAGCTTTTTCCCGTTCGTCTTCCCCTTGTTCCTGTACTCAA-GCCTCT--CT

Hs\_PMS2 GGCTGTCCTTCTTTTTCCCTTG-GCAGGCCT--GATGAAT-CCCTATGTGGCCACTAAGC  
 Hs\_PSD GGCTGTCCTTCTTTTTCCCTTG-GCAGGCCT--GATGAAT-CCCTATGTGGCCACTAAGC  
 Pt\_PMS2 GGCTGTCCTTCTTTTTCCCTTGAGCAGGCCTCTGATGAATGCCCTATGTGGCCACTAAGC  
 Pt\_PSD GGCTGTCCTTCTTTTTCCCTTG-GCAGGCCT--GATGAAT-CCCTATGTGGCCACTAAGC  
 Ci GGCTGTCCTTCTTTTTCCCTTG-GCAGGCCT--GATGAAT-CCCTATGTGGCCACTAAGC  
 Cii GGCTGTCCTTCTTTTTCCCTTG-GCAGGCCT--GATGAAT-CCCTATGTGGCCACTAAGC  
 Ciii GGCTGTCCTTCTTTTTCCCTTG-GCAGGCCT--GATGAAT-CCCTATGTGGCCACTAAGC

Hs\_PMS2 AGAATGAAGGATATCTTTATGTGTGGCTCTGCAAACATCAGCGGTCCATCCTGGGGCTTG  
 Hs\_PSD AGAATGAAGGATATCTTTATGTGTGGCTCTGCAAACATCAGCGGTCCATCCTGGGGCTTG  
 Pt\_PMS2 AGAATGAAAGATATCTTTATGTGTGGCTCTGCAAACATCAGCGGTCCATCCTGGGGCTTG  
 Pt\_PSD AGAATGAAGGATATCTTTATGTGTGGCTCTGCAAACATCAGCGGTCCATCCTGGGGCTTG  
 Ci AGAATGAAGGATATCTTTATGTGTGGCTCTGCAAACATCAGCGGTCCATCCTGGGGCTTG  
 Cii AGAATGAAGGATATCTTTATGTGTGGCTCTGCAAACATCAGCGGTCCATCCTGGGGCTTG  
 Ciii AGAATGAAGGATATCTTTATGTGTGGCTCTGCAAACATCAGCGGTCCATCCTGGGGCTTG

Hs\_PMS2 GCACAGATTGTTGTCCCTGTCTAGAATACTTGTCCCTGCACCCTGCACCCACTTCTCCCC  
Hs\_PSD GCACAGATTGTTGTCCCTGTCTAGAATACTTGTCCCTGCACCCTGCACCCACTTCTCCCC  
Pt\_PMS2 GCACAGATTGTTGTCCCTGTCTAGAATACTTGTCCCTGCACCCTGCACCCACTTCTCCCC  
Pt\_PSD GCACAGATTGTTGTCCCTGTCTAGAATACTTGTCCCTGCACCCTGCACCCACTTCTCCCC  
Ci GCACAGATTGTTGTCCCTGTCTAGAATACTTGTCCCTGCACCCTGCACCCACTTCTCCCC  
Cii GCACAGATTGTTGTCCCTGTCTAGAATACTTGTCCCTGCACCCTGCACCCACTTCTCCCC  
Ciii GCACAGATTGTTGTCCCTGTCTAGAATACTTGTCCCTGCACCCTGCACCCACTTCTCCCC

Hs\_PMS2 GTTACCTGATTAACCTCTCTTATCCCCGGACTCAGCTCAAAGGTCACCTTCCCTGACCCAGG  
Hs\_PSD GTTACCTGATTAACCTCTCTTATCCCCGGACTCAGCTCAAAGGTCACCTTCCCTGACCCAGG  
Pt\_PMS2 ATTACCTGATTAACCTCTCTTATCCCCGGACTCAGCTCAAAGGTCACCTTCCCTGACCCAGG  
Pt\_PSD ATTACCTGATTAACCTCTCTTATCCCCGGACTCAGCTCAAAGGTCACCTTCCCTGACCCAGG  
Ci GTTACCTGATTAACCTCTCTTATCCCCGGACTCAGCTCAAAGGTCACCTTCCCTGACCCAGG  
Cii GTTACCTGATTAACCTCTCTTATCCCCGGACTCAGCTCAAAGGTCACCTTCCCTGACCCAGG  
Ciii GTTACCTGATTAACCTCTCTTATCCCCGGACTCAGCTCAAAGGTCACCTTCCCTGACCCAGG

Hs\_PMS2 GTGAAGTCTCTCTATGACACTGGCTGCTTTTTCTTCCCTGACCTTCCCTGTCGTTTCTCATC  
Hs\_PSD GTGAAGTCTCTCTATGACACTGGCTGCTTTTTCTTCCCTGACCTTCCCTGTCGTTTCTCATC  
Pt\_PMS2 GTGAAGTCTCTCTATGACACTGGCTGCTTTTTCTTCCCTGACCTTCCCTGTCATTTTCTCATC  
Pt\_PSD GTGAAGTCTCTCTATGACACTGGCTGCTTTTTCTTCCCTGACCTTCCCTGTCGTTTCTCATC  
Ci GTGAAGTCTCTCTATGACACTGGCTGCTTTTTCTTCCCTGACCTTCCCTGTCGTTTCTCATC  
Cii GTGAAGTCTCTCTATGACACTGGCTGCTTTTTCTTCCCTGACCTTCCCTGTCGTTTCTCATC  
Ciii GTGAAGTCTCTCTATGACACTGGCTGCTTTTTCTTCCCTGACCTTCCCTGTCGTTTCTCATC

**SNP2**

Hs\_PMS2 ATAATCGACTTGCCCTGAGTATTTGCTCAACGCTTTTCTTCCCCGTAATCTGTTGGCTCC  
Hs\_PSD ATAATCGACTTGCCCTGAGTATTTGCTCAACGCTTTTCTTCCCCGTAATCTGTTGGCTCC  
Pt\_PMS2 ATAATGACTTGCCGGAGTATTTGCTCAACGCTTTTCTTCCCCGTAATCTGTTGGCTCC  
Pt\_PSD ATAATGACTTGCCCTGAGTATTTGCTCAACGCTTTTCTTCCCCGTAATCTGTTGGCTCC  
Ci ATAATCGACTTGCCCTGAGTATTTGCTCAACGCTTTTCTTCCCCGTAATCTGTTGGCTCC  
Cii ATAATCGACTTGCCCTGAGTATTTGCTCAACGCTTTTCTTCCCCGTAATCTGTTGGCTCC  
Ciii ATAATCGACTTGCCCTGAGTATTTGCTCAACGCTTTTCTTCCCCGTAATCTGTTGGCTCC

Hs\_PMS2 AGGACCAAGCCTGTGTTTGTCTACCAGCTGTCTCCTGCCTTGAGCAGTGTGTTTGTCTTATC  
Hs\_PSD AGGACCAAGCCTGTGTTTGTCTACCAGCTGTCTCCTGCCTTGAGCAGTGTGTTTGTCTTATC  
Pt\_PMS2 AGGACCAAGCCTGTGTTTGTCTACCAGCTGTCTCCTGCCTTGAGCAGTGTGTTTGTCTTATC  
Pt\_PSD AGGACCAAGCCTGTGTTTGTCTACCAGCTGTCTCCTGCCTT TAGCAGTGTGTTTGTCTTATC  
Ci AGGACCAAGCCTGTGTTTGTCTACCAGCTGTCTCCTGCCTTGAGCAGTGTGTTTGTCTTATC  
Cii AGGACCAAGCCTGTGTTTGTCTACCAGCTGTCTCCTGCCTTGAGCAGTGTGTTTGTCTTATC  
Ciii AGGACCAAGCCTGTGTTTGTCTACCAGCTGTCTCCTGCCTTGAGCAGTGTGTTTGTCTTATC

Hs\_PMS2 CAGCACTCAGGACCAGATGCAGTGGCTCACACTCGTAATCCCAGCACCTTGGGAGGCTGA  
Hs\_PSD CAGCACTCAGGACCAGATGCAGTGGCTCACACTCGTAATCCCAGCACCTTGGGAGGCTGA  
Pt\_PMS2 CAGCACTCAGGACCAGATGCAGTGGCTCACACTCGTAATCCCAGCACCTTGGGAGGCTGA  
Pt\_PSD CAGCACTCAGGACCAGATGCAGTGGCTCACACTCGTAATCCCAGCACCTTGGGAGGCTGA  
Ci CAGCACTCAGGACCAGATGCAGTGGCTCACACTCGTAATCCCAGCACCTTGGGAGGCTGA  
Cii CAGCACTCAGGACCAGATGCAGTGGCTCACACTCGTAATCCCAGCACCTTGGGAGGCTGA  
Ciii CAGCACTCAGGACCAGATGCAGTGGCTCACACTCGTAATCCCAGCACCTTGGGAGGCTGA

**SNP3**

Hs\_PMS2 AGTGGAAGGATCGCTTGAGCCCAGGAGTTTGTAGAGCAGCCTGGGCAACATAGTGAGACCC  
Hs\_PSD AGTGGAAGGATCGCTTGAGCCCAGGAGTTTGTAGAGCAGCCTGGGCAACATAGTGAGACCC  
Pt\_PMS2 AGTGGAAGGATCCCTTGAGCCCAGGAGTTTGTAGAGCAGCCTGGGCAACATAGTGAGACCC  
Pt\_PSD AGTGGAAGGATCGCTTGAGCCCAGGAGTTTGTAGAGCAGCCTGGGCAACATAGTGAGACCC

Ci AGTGGAAGGATCGCTTGAGCCCAGGAGTTTGTAGAGCAGCCTGGGCAACATAGTGAGACCC  
 Cii AGTGGAAGGATCGCTTGAGCCCAGGAGTTTGTAGAGCAGCCTGGGCAACATAGTGAGACCC  
 Ciii AGTGGAAGGATCGCTTGAGCCCAGGAGTTTGTAGAGCAGCCTGGGCAACATAGTGAGACCC

**PDSviii**

Hs\_PMS2 TGTCTCTATCTTTGAAAAAATAACGAAAGGTTAAAAA-----CAAACAGTAAAT  
 Hs\_PSD TGTCTCTATCTTTGAAAAAATAACGAAAGGTTAAAAA-----GCACTCAGTAAAT  
 Pt\_PMS2 TGTCTCTATCTTTGAAAAAATAACAAAAGTTAAAAA-----GCACTCAGTAAAT  
 Pt\_PSD TGTCTCTATCTTTGAAAAAATAACAAAAGGTTAAAAA-----CTCAGTAAAT  
 Ci TGTCTCTATCTTTGAAAAAATAACGAAAGGTTAAAAA-----CTCAGTAAAT  
 Cii TGTCTCTATCTTTGAAAAAATAACGAAAGGTTAAAAA-----CTCAGTAAAT  
 Ciii TGTCTCTATCTTTGAAAAAATAACGAAAGGTTAAAAA-----CTCAGTAAAT

**PDSix** **PDSx**

Hs\_PMS2 CCAGGAGGAGAGAGGGATGGAGATATAATACAGGCAGAGGAAGGAACAGGATAGCAAAT  
 Hs\_PSD CCAGGAGGAGAGAGGGATGGAGATATAATACAGGCAGAGGAAGGAACAGGATAGCAAAT  
 Pt\_PMS2 CCAGGAGGAGAGAGGGATGGAGATATAATACAGGCAGAGGAAGGAACAGGATAGCAACAT  
 Pt\_PSD CCAGGAGGAGAGAGGGATGGAGATATAATACAGGCAGAGGAAGGAACAGGATAGCAAAT  
 Ci CCAGGAGGAGAGAGGGATGGAGATATAATACAGGCAGAGGAAGGAACAGGATAGCAAAT  
 Cii CCAGGAGGAGAGAGGGATGGAGATATAATACAGGCAGAGGAAGGAACAGGATAGCAAAT  
 Ciii CCAGGAGGAGAGAGGGATGGAGATATAATACAGGCAGAGGAAGGAACAGGATAGCAAAT

**PDSxi**

Hs\_PMS2 AAAAGCTGTCTGTTTCATTCTGTTTACAAATGCTGGCAATGACCTAACCCAGTGTTCAAA  
 Hs\_PSD AAAAGCTGTCTGTTTCATTCTGTTTACAAATGCTGGCAATGACCTAACCCAGTGTTCAAA  
 Pt\_PMS2 AAAAGCTGTCTGTTTCAT-----AAATGCTGGCAATGACCTAACCCAGTGTTCAAA  
 Pt\_PSD AAAAGCTGTCTGTTTCATTCTGTTTACAAATGCTGGCAATGACCTAACCCAGTGTTCAAA  
 Ci AAAAGCTGTCTGTTTCATTCTGTTTACAAATGCTGGCAATGACCTAACCCAGTGTTCAAA  
 Cii AAAAGCTGTCTGTTTCATTCTGTTTACAAATGCTGGCAATGACCTAACCCAGTGTTCAAA  
 Ciii AAAAGCTGTCTGTTTCATTCTGTTTACAAATGCTGGCAATGACCTAACCCAGTGTTCAAA

**PDSxii** **PDSxiii**

Hs\_PMS2 TTCTGTATTAGAAGGAGGAAAAATAGCATTTTTTGTGATACTGTTATCCTTAAGGAAAGGA  
 Hs\_PSD TTCTGTATTAGAAGGAGGAAAAATAGCATTTTTTGTGATACTGTTATCCTTAAGGAAAGGA  
 Pt\_PMS2 TTCTGTATTAGAAGGAGGAAAAATAGCATTTTTTGTGATACTGTTATCCTTAAGGAAAGGA  
 Pt\_PSD TTCTGTATTAGAAGGAGGAAAAATAGCATTTTTTGTGATACTGTTATCCTTAAGGAAAGGA  
 Ci TTCTGTATTAGAAGGAGGAAAAATAGCATTTTTTGTGATACTGTTATCCTTAAGGAAAGGA  
 Cii TTCTGTATTAGAAGGAGGAAAAATAGCATTTTTTGTGATACTGTTATCCTTAAGGAAAGGA  
 Ciii TTCTGTATTAGAAGGAGGAAAAATAGCATTTTTTGTGATACTGTTATCCTTAAGGAAAGGA

**SNP4**

Hs\_PMS2 TTCAGAAAAGTGGGAGTCATTGGCGTGGCAGGCTGAGGAAAAAGCAAACACTACTTTTTGTA  
 Hs\_PSD TTCAGAAAAGTGGGAGTCATTGGCGTGGCAGGCTGAGGAAAAAGCAAACACTACTTTTTGTA  
 Pt\_PMS2 TTCAGAAAAGTGGGAGTCATTGGCGTGGCAGGCTGAGGAAAAAGCAAACACTACTTTTTGTA  
 Pt\_PSD TTCAGAAAAGTGGGAGTCATTGGCGTGGCAGGCTGAGGAAAAAGCAAACACTACTTTTTGTA  
 Ci TTCAGAAAAGTGGGAGTCATTGGCGTGGCAGGCTGAGGAAAAAGCAAACACTACTTTTTGTA  
 Cii TTCAGAAAAGTGGGAGTCATTGGCGTGGCAGGCTGAGGAAAAAGCAAACACTACTTTTTGTA  
 Ciii TTCAGAAAAGTGGGAGTCATTGGCGTGGCAGGCTGAGGAAAAAGCAAACACTACTTTTTGTA

**PDSxiv** **PDSxv**

Hs\_PMS2 GCTACTTGAACTTTTTTTTTTTTTTTTT----GAGACAGAGTCTTGCCCTGTTGCCCAGGCT  
 Hs\_PSD GCTACTTGAACTTTTTTTTTTTTTTTTT----GAGACAGAGTCTTGCCCTGTTGCCCAGGCT  
 Pt\_PMS2 GCTACTTGAACTTTTTTTTTTTTTTTTT----GAGACAGAGTCTTGCCCTGTTGCCCAGGCT  
 Pt\_PSD GCTACTTGAACTTTTTTTTTTTTTTTTT----GAGACAGAGTCTTGCCCTGTTGCCCAGGCT  
 Ci GCTACTTGAACTTTTTTTTTTTTTTTTT----GAGACAGAGTCTTGCCCTGTTGCCCAGGCT  
 Cii GCTACTTGAACTTTTTTTTTTTTTTTTT----GAGACAGAGTCTTGCCCTGTTGCCCAGGCT  
 Ciii GCTACTTGAACTTTTTTTTTTTTTTTTT----GAGACAGAGTCTTGCCCTGTTGCCCAGGCT

Hs\_PMS2 GGAGTGCAGTGGTGTGATCTTGGCTCACTGCAACCTCCACCTCCTGGGTTCAAGCAATTC  
 Hs\_PSD GGAGTGCAGTGGTGTGATCTTGGCTCACTGCAACCTCCACCTCCTGGGTTCAAGCAATTC  
 Pt\_PMS2 GGAGTGCAGTGGTGTGATCT**CA**GCTCACTGCAACCTCCACCTCCTGGGTTCAAGCAATTC  
 Pt\_PSD GGAGTGCAGTGGTGTGATCTTGGCTCACTGCAACCTCCACCTCCTGGGTTCAAGCAATTC  
 Ci GGAGTGCAGTGGTGTGATCTTGGCTCACTGCAACCTCCACCTCCTGGGTTCAAGCAATTC  
 Cii GGAGTGCAGTGGTGTGATCTTGGCTCACTGCAACCTCCACCTCCTGGGTTCAAGCAATTC  
 Ciii GGAGTGCAGTGGTGTGATCTTGGCTCACTGCAACCTCCACCTCCTGGGTTCAAGCAATTC

Hs\_PMS2 TAGTGCCTCAGCCTCCCGAGTAGCTGGGATTACAGGCATGAGCCACCACCTTCCAGCTAAT  
 Pt\_PMS2 TAGTGCCTCAGCCTCCCGAGTAGCTGGGATTACAGGCATGAGCCACCACCTTCCAGCTAAT  
 Hs\_PSD TAGTGCCTCAGCCTCCCGAGTAGCTGGGATTACAGGCATGAGCCACCACCTTCCAGCTAAT  
 Pt\_PSD TAGTGCCTCAGCCTCCCGAGTAGCTGGGATTACAGGCATGAGCCACCACCTTCCAGCTAAT  
 Ci TAGTGCCTCAGCCTCCCGAGTAGCTNNNNNNNNNNNNNNNNNNNNNNNNNNNNNNNNNNNN  
 Cii TAGTGCCTCAGCCTCCCGAGTAGCTNNNNNNNNNNNNNNNNNNNNNNNNNNNNNNNNNNNN  
 Ciii TAGTGCCTCAGCCTCCCGAGTAGCTNNNNNNNNNNNNNNNNNNNNNNNNNNNNNNNNNNNN

**PDSxvi**

Hs\_PMS2 TTTTGTTTTTATGGGTGTTTTTTTTTTTTTTTTTTTTTTTTTTTTTTTTTT-----GAGACAGAGTCTTGT  
 Hs\_PSD TTTTGTTTTT**G**TGGGTGTTTTTTTTTTTTTTTTTTTTTTTTTTTTTTTTTTGAGACAGAGTCTTGT  
 Pt\_PMS2 TTTTGTTTTTGTGGGT**T**TTTTTTTTTTTTTTTTTTTTTTTTTTTTTTTTTT-----GAGACAGAGTCTTGT**C**  
 Pt\_PSD TTTTGTTTTTGTGGGTGTTTTTTTTTTTTTTTTTTTTTTTTTTTTTTTTTT-----GAGACAGAGTCTTGT  
 Ci NNNNNNNNNNNNNNGTGTTTTTTTTTTTTTTTTTTTTTTTTTTTTTTTTTTT-----GAGACAGAGTCTTGT  
 Cii NNNNNNNNNNNNNNNNTTTTTTTTTTTTTTTTTTTTTTTTTTTTTTTTTTT-----GAGACAGAGTCTTGT  
 Ciii NNNNNNNNNNNNNNGTGTTTTTTTTTTTTTTTTTTTTTTTTTTTTTTTTTTT-----GAGACAGAGTCTTGT

Hs\_PMS2 GTGTCGCCCAGGCTGGAGTACAGTGGCGTGATCTTGGCTCTCACTACAACCTCTGCCTCC  
 Hs\_PSD GTGTCGCCCAGGCTGGAGTACAGTGGCGTGATCTTGGCTCTCACTACAACCTCTGCCTCC  
 Pt\_PMS2 **A**TGTC**A**TCCAGGCTGGAGT**A**TAGTGGCGTGATCTTGGCT--CACT**G**CAACCTCTGCCTCC  
 Pt\_PSD GTG**T****G**ACCAGGCTGGAGT**A**TAGTGG**T**GTGATCTTGGCTCTCACT**G**CAACCTCTGCCTCC  
 Ci GTGTCGCCCAGGCTGGAGTACAGTGGCGTGATCTTGGCTCTCACTACAACCTCTGCCTCC  
 Cii GTGTCGCCCAGGCTGGAGTACAGTGGCGTGATCTTGGCTCTCACTACAACCTCTGCCTCC  
 Ciii GTGTCGCCCAGGCTGGAGTACAGTGGCGTGATCTTGGCTCTCACTACAACCTCTGCCTCC

Hs\_PMS2 CTCTGGGTTCAAACGAATCTCATGCCTAAGCCTCCCAAGTAGCTGGGACTACAGGCGTG  
 Hs\_PSD CTCTGGGTTCAAACGAATCTCATGCCTAAGCCTCCCAAGTAGCTGGGACTACAGGCGTG  
 Pt\_PMS2 -----TGGGTTCAAACGAATCTC**C**TGCCTAAGCCTCCCAAG**G**AGCTGGGACTACAGGCGTG  
 Pt\_PSD -----TGGGTTCAAACGAATCTC**C**TGCCTAAGCCTCCCAAGTAGCTGGGACTACAGGCGTG  
 Ci CTCTGGGTTCAAACGAATCTCATGCCTAAGCCTCCCAAGTAGCTGGGACTACAGGCGTG  
 Cii CTCTGGGTTCAAACGAATCTCATGCCTAAGCCTCCCAAGTAGCTGGGACTACAGGCGTG  
 Ciii CTCTGGGTTCAAACGAATCTCATGCCTAAGCCTCCCAAGTAGCTGGGACTACAGGCGTG

**SNP5**

**PDSxvii**

**SNP6**

**PDSxviii**

Hs\_PMS2 CGCCAC-CATGCC-TGGCCTAATTTTTT**A**TTTTTTAGTAGAGAGAGTGT**T****G**CTGTGTT  
 Hs\_PSD CGCCAC-CATGCC-TGGCCTAATTTTTT**A**TATTTTTAGTAGAGAGAG**G**TTTTCGC**G**GTGTT  
 Pt\_PMS2 CGCCAC**G**CATGCC**C**TGGC**T**TAAATTTTTT**A**TATTTTTAGTAGAGAGAGGGTTTTCGCCGTGTT  
 Pt\_PSD CGCCAC**G**CATGCC**C**TGGC**T**TAAATTTTTT**A**TATTTTTAGTAGAGAGAGGGTTTTCGCCGTGTT  
 Ci CGCCAC-CATGCC-TGGCCTAATTTTTT**A**TATTTTTAGTAGAGAGAG**G**TTTTCGC**G**GTGTT  
 Cii CGCCAC-CATGCC-TGGCCTAATTTTTT**A**TATTTTTAGTAGAGAGAG**G**TTTTCGC**G**GTGTT  
 Ciii CGCCAC-CATGCC-TGGCCTAATTTTTT**A**TATTTTTAGTAGAGAGAG**G**TTTTCGC**G**GTGTT

**PDSxix PDSxx**

**PDSxxi PDSxxii**

Hs\_PMS2 GACCAGGCCGTCTCAAACCTCCTGGCCTCAAGAGATCTGCCTGCCTCGGGCTCCTAAAGT  
 Hs\_PSD GACCAGGC**T****G**A**T**CTCAAACCTCCTGGCCTCAAGAGATCTGCCTGCCTC**A****G****C**CTCCTAAAGT  
 Pt\_PMS2 GACCAGGCTGATCTCAAACCTCCTGGCCTCAAGAGATCTGCCTGCCTCGGGCTCCTAAAGT  
 Pt\_PSD GACCAGGCTGATCTCAAACCTCCTGGCCTCAAGAGATCTGCCTGCCTCGGGCTCCTAAAGT  
 Ci GACCAGGC**T****G**A**T**CTCAAACCTCCTGGCCTCAAGAGATCTGCCTGCCTC**A****G****C**CTCCTAAAGT

Cii GACCAGGCTGATCTCAAACCTCTGGCCTCAAGAGATCTGCCTGCCTCAGCTCCTAAAGT  
 Ciii GACCAGGCTGATCTCAAACCTCTGGCCTCAAGAGATCTGCCTGCCTCAGCTCCTAAAGT

**PDS:xxiii**

Hs\_PMS2 GCTGAGATTACAGGCGTGAGCCACCGCACCTGGCCTGTAGCTACTTTAACTTCTAAAAAG  
 Hs\_PSD GCTGAGATTACAGGCGTGAGCCACCGCACCTGGCCTGTAGCTACTTTAACTTCTAAAAAG  
 Pt\_PMS2 GCTGAGATTACAGGCGTGAGCCACCGCACCTGGCCTGTAGCTACTTTAACTTCTAAAAAG  
 Pt\_PSD GCTGAGATTACAGGCGTGAGCCACCGCACCTGGCCTGTAGCTACTTTAACTTCTAAAAAG  
 Ci GCTGAGATTACAGGCGTGAGCCACCGCACCTGGCCTGTAGCTACTTTAACTTCTAAAAAG  
 Cii GCTGAGATTACAGGCGTGAGCCACCGCACCTGGCCTGTAGCTACTTTAACTTCTAAAAAG  
 Ciii GCTGAGATTACAGGCGTGAGCCACCGCACCTGGCCTGTAGCTACTTTAACTTCTAAAAAG

**SNP7**

Hs\_PMS2 AACCTTAAAGAAAGAGAAAAATAAAAGGAACCTTCTCAGGAAGTTTTGTGACACTTAGCTGA  
 Hs\_PSD AACCTTAAAGAAAGAGAAAAATAAAAGGAACCTTCTCAGGAAGTTTTGTGACACTTAGCTGA  
 Pt\_PMS2 AACCTTAAAGAAAGAGAAAAATAAAAGGAACCTTCTCAGGAAGTTTTGTGACACTTAGCTGA  
 Pt\_PSD AACCTTAAAGAAAGAGAAAAATAAAAGGAACCTTCTCAGGAAGTTTTGTGACACTTAGCTGA  
 Ci AACCTTAAAGAAAGAGAAAAATAAAAGGAACCTTCTCAGGAAGTTTTGTGACACTTAGCTGA  
 Cii AACCTTAAAGAAAGAGAAAAATAAAAGGAACCTTCTCAGGAAGTTTTGTGACACTTAGCTGA  
 Ciii AACCTTAAAGAAAGAGAAAAATAAAAGGAACCTTCTCAGGAAGTTTTGTGACACTTAGCTGA

**PDS:xxiv PDS:xxv PDS:xxvi**

Hs\_PMS2 GTAGTGTGTTGTTATTTGTGTTGTTATTTTGACATGAATTCAAAATACAGTATTGTTGTTTT  
 Hs\_PSD ATTAAGTGTGTTATTTGTGTTGTTATTTTGACATGAATTCAAAATACAGTATTGTTGTTTT  
 Pt\_PMS2 ATAATGTTGTTATTCGTGTTGTTATTTTGACATGAATTCAAAATACAGTATTGTTGTTTT  
 Pt\_PSD ATAATGTTGTTATTCGTGTTGTTATTTTGACATGAATTCAAAATACAGTATTGTTGTTTT  
 Ci ATTAAGTGTGTTATTTGTGTTGTTATTTTGACATGAATTCAAAATACAGTATTGTTGTTTT  
 Cii ATTAAGTGTGTTATTTGTGTTGTTATTTTGACATGAATTCAAAATACAGTATTGTTGTTTT  
 Ciii ATTAAGTGTGTTATTTGTGTTGTTATTTTGACATGAATTCAAAATACAGTATTGTTGTTTT

**SNP8**

Hs\_PMS2 CATTTCAATTTCTGCTGTAAAGCTAAATGTTTGACTTCAGGATATGGTTTGAATCATTTTTT  
 Hs\_PSD CATTTCAATTTCTGCTGTAAAGCTAAATGTTTGACTTCAGGATATGGTTTGAATCATTTTTT  
 Pt\_PMS2 CATTTCAATTTCTGCTGTAAAGCTAAATGTTTGACTTCAGGATATGGTTTGAATCATTTTCT  
 Pt\_PSD CATTTCAATTTCTGCTGTAAAGCTAAATGTTTGACTTCAGGATATGGTTTGAATCATTTTCT  
 Ci CATTTCAATTTCTGCTGTAAAGCTAAATGTTTGACTTCAGGATATGGTTTGAATCATTTTTT  
 Cii CATTTCAATTTCTGCTGTAAAGCTAAATGTTTGACTTCAGGATATGGTTTGAATCATTTTTT  
 Ciii CATTTCAATTTCTGCTGTAAAGCTAAATGTTTGACTTCAGGATATGGTTTGAATCATTTTTT

Hs\_PMS2 GTGTTTTTCAG  
 Hs\_PSD GTGTTTTTCAG  
 Pt\_PMS2 GTGTTTTTCAG  
 Pt\_PSD GTGTTTTTCAG  
 Ci GTGTTTTTCAG  
 Cii GTGTTTTTCAG  
 Ciii GTGTTTTTCAG



**Supp. Table S1. List of primers**

| Name                                                    | Location   | Orientation | PCR/Seq | Sequence                          |
|---------------------------------------------------------|------------|-------------|---------|-----------------------------------|
| <b>cDNA sequencing of <i>PMS2</i> and <i>PMS2CL</i></b> |            |             |         |                                   |
| PMS2B_F <sup>1</sup>                                    | Ex 11      | Fwd         | PCR     | 5'-CAGCCACTGCTGGATGTTGAAGG-3'     |
| PMS2B_R <sup>1</sup>                                    | Ex 15      | Rev         | PCR     | 5'-GGTTTGAAAAGGTTCTCAAGATCAC-3'   |
| PMS2CLB_F                                               | Ex 9/Ex 11 | Fwd         | PCR     | 5'-CTTAACATTTCTGTTGATTCAGGTAAC-3' |
| PMS2A_R                                                 | Ex 11      | Rev         | Seq     | 5'-CTTTCTCCTGAGAGTCCACATG-3'      |
| PMS2_6                                                  | Ex 11      | Fwd         | Seq     | 5'-TCTGACAAAAGGCGTCCTGAG-3'       |
| PMS2_7                                                  | Ex 11      | Fwd         | Seq     | 5'-TCTCAGGTTGATGTAGCTGTG-3'       |
| PMS2_8                                                  | Ex 12/Ex13 | Fwd         | Seq     | 5'-GGCTCATAGCACCTCAGACTCTC-3'     |
| <b>ODS1-specific PCR</b>                                |            |             |         |                                   |
| PMS2in12_ODS1AF                                         | IVS 12     | Fwd         | PCR     | 5'-CCACTGAACCTGTGTAGTTTA-3'       |
| PMS2in12_8F                                             | IVS 12     | Fwd         | PCR     | 5'-CTGCAGAAATTTGGTATTTCTCTC-3'    |
| PMS2in12_8R                                             | IVS 12     | Rev         | PCR     | 5'-CTATTAAGAGGAACAGGGAAGGG-3'     |
| <b>ODS2-specific PCR</b>                                |            |             |         |                                   |
| PMS2in12_ODS2GR                                         | IVS 12     | Rev         | PCR     | 5'-CCAACCTTGAAATGTCACAGAC-3'      |
| PMS2in12_PDS2GF                                         | IVS 12     | Fwd         | PCR     | 5'-CAAATGTAAAAAATTAGTCAGACTTG-3'  |
| PMS2in12_PDS2CF                                         | IVS 12     | Fwd         | PCR     | 5'-CAAATGTAAAAAATTAGTCAGACTTC-3'  |
| <b>*17C-specific PCR</b>                                |            |             |         |                                   |
| PMS2_*17CF                                              | Ex 15      | Fwd         | PCR     | 5'-AACTGACCGTAGTCACTGTATGC-3'     |
| PMS2_15_1F                                              | Ex 15      | Fwd         | PCR     | 5'-GAAGGCCAACCATGAGACAC-3'        |
| PMS2B_R <sup>1</sup>                                    | Ex 15      | Rev         | PCR     | 5'-GGTTTGAAAAGGTTCTCAAGATCAC-3'   |
| <b>H1 allele specific multiplex PCR</b>                 |            |             |         |                                   |
| PMS2in12_ODS1AF                                         | IVS 12     | Fwd         | PCR     | 5'-CCACTGAACCTGTGTAGTTTA-3'       |
| PMS2in12_ODS2GR                                         | IVS 12     | Rev         | PCR     | 5'-CCAACCTTGAAATGTCACAGAC-3'      |
| PMS2_*17CF                                              | Ex 15      | Fwd         | PCR     | 5'-AACTGACCGTAGTCACTGTATGC-3'     |
| PMS2B_R <sup>1</sup>                                    | Ex 15      | Rev         | PCR     | 5'-GGTTTGAAAAGGTTCTCAAGATCAC-3'   |
| PMS2in14_1F                                             | IVS 14     | Fwd         | PCR     | 5'-GAAGTGGAATGAATAACCTGACAG-3'    |
| <b>Characterization of the 5' breakpoint</b>            |            |             |         |                                   |
| PMS2c2253G_R                                            | Ex 13      | Rev         | PCR/Seq | 5'-CCATTTTCATCGATAACAAAATCG-3'    |
| PMS2c2253A_R                                            | Ex 13      | Rev         | PCR/Seq | 5'-CATTTTCATCGATAACAAAATCA-3'     |
| LRPCR4_Fwd <sup>2</sup>                                 | IVS 12     | Fwd         | PCR/Seq | 5'-AAATTAGTCAGACTTGATGGTGTG-3'    |
| PMS2in12_PDS2CF                                         | IVS 12     | Fwd         | PCR/Seq | 5'-CAAATGTAAAAAATTAGTCAGACTTC-3'  |
| PMS2in12_ODS1AF                                         | IVS 12     | Fwd         | PCR/Seq | 5'-CCACTGAACCTGTGTAGTTTA-3'       |
| PMS2in12_2F                                             | IVS 12     | Rev         | Seq     | 5'-CACCACACCTGGCTAATTTTTTG-3'     |
| PMS2in12_2R                                             | IVS 12     | Fwd         | Seq     | 5'-CTGGCAGGGCAGGGTGGAAC-3'        |
| PMS2in12_univ.1F                                        | IVS 12     | Fwd         | Seq     | 5'-ATACTTGTCTGCACCCTGC-3'         |
| PMS2in12_univ.2F                                        | IVS 12     | Fwd         | Seq     | 5'-AGGCAGAGGAAGGAACAGG-3'         |
| PMS2in12_univ.3R                                        | IVS 12     | Rev         | Seq     | 5'-CAAAAATTAGCTGGAAGTGG-3'        |
| <b>Characterization of the 3' breakpoint</b>            |            |             |         |                                   |
| PMS2_*17CF                                              | Ex 15      | Fwd         | PCR     | 5'-AACTGACCGTAGTCACTGTATGC-3'     |
| LRPCR4_Rev <sup>2</sup>                                 | 3' UTR     | Rev         | PCR     | 5'-CTTCCATCTCCAAAACCAGCAAGA-3'    |
| PMS2_15_2F                                              | 3' UTR     | Fwd         | Seq     | 5'-GTGTGTCCAGGCAAGAACAC-3'        |
| PMS2_15_2R                                              | 3' UTR     | Rev         | Seq     | 5'-CTGTTATCCTGCCACAGCTC-3'        |
| <b>c.2340T-specific PCR</b>                             |            |             |         |                                   |
| Clend14F <sup>2</sup>                                   | IVS 13     | Fwd         | PCR     | 5'-GGTCTGTATCTCCTGACCTCATGAT-3'   |
| PMS2c2340_TR                                            | Ex 14      | Rev         | PCR     | 5'-CAGTTCATCGACGTCCTGA-3'         |

PCR=Primer for PCR, Seq = Primer for sequencing, IVS= Intron, Ex=Exon,<sup>1</sup> Etzler et al., 2008 (note that primer PMS2B\_R contained an erroneous sequence in Etzler et al., 2008), <sup>2</sup> Primer designed by Clendenning et al. (2006)

**Supp. Table S2. Genotypes in PMS2 exons 11-15 of 150 individuals from 3 different ethnic backgrounds.**

All sites in exons 11-15 showing sequence variations in 150 control individuals from three different ethnic backgrounds, i.e. Caucasians (C), Hispanics (H) and African-Americans (A), are listed. SNPs listed in dbSNP as polymorphic variants in the gene are indicated with +. C to T transitions at CpG-dinucleotides are indicated with a star. Allele frequencies of the SNPs in this cohort are given at the bottom of the table. Individuals are named according to their ethnic origin with initials C, H or A and consecutive Arabic numbers.

| Exon                | 11                  |                     |                     |                     |                     |                     |                     |                     |                     |                     |                     |                     | 13                  | 14                  | 15                  |                     |                     |                  |                   |                                        |                    |                    |   |
|---------------------|---------------------|---------------------|---------------------|---------------------|---------------------|---------------------|---------------------|---------------------|---------------------|---------------------|---------------------|---------------------|---------------------|---------------------|---------------------|---------------------|---------------------|------------------|-------------------|----------------------------------------|--------------------|--------------------|---|
| nucleotide position | c.1266G>A (p.A423T) | c.1408C>T (p.P470S) | c.1437C>G (p.H479Q) | c.1454C>A (p.T485K) | c.1488C>T (p.H496H) | c.1531A>C (p.T511P) | c.1532C>T (p.T511M) | c.1557T>C (p.Y519Y) | c.1621G>A (p.E541K) | c.1711C>A (p.L571I) | c.1789A>T (p.T597S) | c.1866G>A (p.M622I) | c.2253T>C (p.F571F) | c.2324A>G (p.N775S) | c.2340C>T (p.P780P) | c.2466T>C (p.L822L) | c.2570G>C (p.G857A) | c.*17G>C (3'UTR) | c.*92dupA (3'UTR) | Deduced haplotype as given in table S3 | ODS 1-specific PCR | c.*17-specific PCR |   |
| CpG                 |                     |                     |                     |                     | *                   |                     | *                   |                     |                     |                     |                     |                     | *                   |                     |                     |                     |                     |                  |                   |                                        |                    |                    |   |
| dbSNP               | -                   | +                   | +                   | +                   | +                   | +                   | +                   | +                   | +                   | +                   | +                   | +                   | +                   | +                   | +                   | -                   | -                   | +                |                   |                                        |                    |                    |   |
| ID                  |                     |                     |                     |                     |                     |                     |                     |                     |                     |                     |                     |                     |                     |                     |                     |                     |                     |                  |                   | Allele 1                               | Allele 2           |                    |   |
| A02                 | G                   | C                   | C                   | C                   | C                   | A                   | C                   | T                   | G                   | C                   | A                   | G                   | C                   | G                   | Y                   | Y                   | G                   | S                | A,A               | H1-A                                   | H1-A               | +                  | + |
| A31                 | G                   | C                   | C                   | C                   | C                   | A                   | C                   | T                   | R                   | C                   | A                   | G                   | Y                   | R                   | C                   | Y                   | G                   | G                | (-),A             | H1-A                                   | N                  | +                  | - |
| A40                 | G                   | C                   | C                   | C                   | C                   | A                   | C                   | T                   | G                   | C                   | A                   | G                   | Y                   | R                   | C                   | Y                   | S                   | G                | (-),A             | H1-A                                   | N                  | +                  | - |
| C28                 | G                   | Y                   | C                   | C                   | C                   | A                   | C                   | T                   | G                   | C                   | A                   | G                   | Y                   | R                   | Y                   | Y                   | G                   | S                | (-),A             | H1-A                                   | N                  | +                  | + |
| C47                 | G                   | C                   | C                   | C                   | C                   | A                   | C                   | T                   | R                   | C                   | A                   | G                   | Y                   | R                   | Y                   | Y                   | G                   | S                | (-),A             | H1-A                                   | N                  | +                  | + |
| C06                 | G                   | Y                   | C                   | C                   | C                   | A                   | C                   | T                   | G                   | C                   | A                   | G                   | Y                   | R                   | Y                   | Y                   | G                   | S                | (-),A             | H1-A                                   | N                  | +                  | + |
| C08                 | G                   | C                   | C                   | M                   | C                   | A                   | C                   | T                   | G                   | C                   | A                   | G                   | Y                   | R                   | Y                   | Y                   | G                   | S                | (-),A             | H1-A                                   | N                  | +                  | + |
| H02                 | G                   | C                   | C                   | C                   | C                   | A                   | C                   | T                   | G                   | C                   | A                   | G                   | Y                   | R                   | Y                   | Y                   | G                   | S                | (-),A             | H1-A                                   | N                  | +                  | + |
| H37                 | G                   | Y                   | C                   | C                   | C                   | A                   | C                   | T                   | G                   | C                   | A                   | G                   | Y                   | R                   | Y                   | Y                   | G                   | S                | (-),A             | H1-A                                   | N                  | +                  | + |
| A45                 | G                   | C                   | C                   | C                   | C                   | A                   | C                   | T                   | G                   | C                   | A                   | G                   | Y                   | R                   | Y                   | Y                   | G                   | S                | (-),A             | H1-A                                   | N                  | +                  | + |
| C17                 | G                   | C                   | C                   | C                   | C                   | A                   | C                   | T                   | G                   | C                   | A                   | G                   | Y                   | R                   | Y                   | Y                   | G                   | G                | (-),A             | H1-A                                   | H2                 | +                  | - |
| H20                 | G                   | C                   | C                   | C                   | C                   | A                   | C                   | T                   | G                   | M                   | A                   | G                   | Y                   | R                   | Y                   | T                   | S                   | G                | (-),(-)           | H1-A                                   | N                  | +                  | - |
| A12                 | G                   | Y                   | C                   | C                   | C                   | A                   | C                   | T                   | G                   | M                   | A                   | G                   | Y                   | R                   | Y                   | Y                   | G                   | S                | A,A               | H1-A                                   | H3                 | +                  | + |
| A34                 | G                   | C                   | C                   | C                   | C                   | A                   | C                   | T                   | R                   | M                   | A                   | G                   | Y                   | R                   | Y                   | Y                   | G                   | S                | (-),A             | H1-A                                   | N                  | +                  | + |
| A46                 | G                   | C                   | C                   | C                   | Y                   | A                   | C                   | T                   | G                   | M                   | A                   | G                   | Y                   | R                   | Y                   | Y                   | G                   | S                | (-),A             | H1-A                                   | N                  | +                  | + |
| C16                 | G                   | C                   | C                   | C                   | C                   | A                   | C                   | T                   | G                   | M                   | A                   | G                   | Y                   | R                   | Y                   | Y                   | G                   | S                | (-),A             | H1-A                                   | N                  | +                  | + |
| A17                 | G                   | C                   | C                   | C                   | C                   | A                   | Y                   | T                   | G                   | C                   | A                   | G                   | C                   | G                   | C                   | Y                   | G                   | G                | A,A               | H1-B                                   | H1-C2              | +                  | - |
| A36                 | G                   | Y                   | C                   | C                   | C                   | A                   | Y                   | T                   | G                   | C                   | A                   | G                   | Y                   | R                   | C                   | C                   | G                   | G                | A,A               | H1-B                                   | H2                 | +                  | - |

|     |   |   |   |   |   |   |   |   |   |   |   |   |   |   |   |   |   |   |       |       |       |   |   |
|-----|---|---|---|---|---|---|---|---|---|---|---|---|---|---|---|---|---|---|-------|-------|-------|---|---|
| A50 | G | Y | C | C | C | A | Y | T | G | C | A | G | Y | R | C | T | G | G | (-),A | H1-B  | N     | + | - |
| A06 | G | Y | C | C | C | A | Y | T | G | C | A | G | Y | R | C | T | G | G | (-),A | H1-B  | N     | + | - |
| H36 | R | Y | C | C | C | A | Y | T | G | C | A | G | Y | R | C | Y | G | G | A,A   | H1-B1 | H3    | + | - |
| A13 | R | C | C | C | C | A | Y | T | G | C | A | G | Y | R | C | Y | G | G | (-),A | H1-B1 | N     | + | - |
| A04 | G | C | C | C | Y | A | C | T | G | C | A | G | Y | R | C | T | G | G | (-),A | H1-C  | N     | + | - |
| A22 | G | C | C | C | C | A | C | T | G | C | A | G | Y | R | C | T | S | G | (-),A | H1-C1 | N     | + | - |
| A30 | G | Y | C | C | C | A | C | T | G | C | A | G | Y | R | C | Y | G | G | A,A   | H1-C1 | H3    | + | - |
| A43 | G | C | C | C | C | A | C | T | G | C | A | G | Y | R | C | T | G | G | (-),A | H1-C1 | N     | + | - |
| A35 | G | Y | C | C | C | A | C | T | G | C | A | G | Y | R | C | Y | G | G | A,A   | H1-C2 | H3    | + | - |
| A33 | G | Y | C | C | C | A | C | T | G | C | A | G | C | G | C | Y | G | G | A,A   | H1-C2 | H1-C2 | + | - |
| A11 | G | Y | C | C | C | A | C | T | G | C | A | G | Y | R | C | T | G | G | A,A   | H1-C2 | H3    | + | - |
| A28 | G | C | C | M | C | A | C | T | G | C | A | G | Y | R | C | T | G | G | (-),A | H1-C2 | N     | + | - |
| A29 | G | Y | C | C | C | A | C | T | G | C | A | G | Y | R | C | T | G | G | (-),A | H1-C2 | N     | + | - |
| A08 | G | Y | C | C | C | A | C | T | G | C | A | G | Y | R | C | T | G | G | (-),A | H1-C2 | N     | + | - |
| H17 | G | Y | C | C | C | A | Y | T | G | C | A | G | T | A | C | Y | G | G | (-),A | H2    | N     | + | - |
| A38 | G | Y | C | C | C | A | C | T | G | C | A | G | T | A | C | Y | S | G | (-),A | H2    | N     | - | - |
| A07 | G | Y | C | C | C | A | C | T | G | C | A | G | T | A | C | Y | S | G | (-),A | H2    | N     | - | - |
| C31 | G | Y | C | C | C | A | C | T | G | C | A | G | T | A | C | Y | S | G | (-),A | H2    | N     | - | - |
| C50 | G | Y | C | C | C | A | C | T | G | C | A | G | T | A | C | Y | S | G | (-),A | H2    | N     | - | - |
| H41 | G | Y | C | C | C | A | C | T | G | C | A | G | T | A | C | Y | S | G | (-),A | H2    | N     | - | - |
| A16 | G | T | C | C | C | A | C | T | G | C | A | G | T | A | C | Y | G | G | (-),A | H2    | N     | - | - |
| A23 | G | C | S | C | C | A | C | T | R | C | A | G | T | A | C | Y | G | G | (-),A | H2    | N     | - | - |
| A25 | G | C | S | C | Y | A | C | T | G | C | A | G | T | A | C | Y | G | G | (-),A | H2    | N     | - | - |
| C11 | G | Y | C | C | C | A | C | T | R | C | A | G | T | A | C | Y | G | G | (-),A | H2    | N     | - | - |
| C18 | G | Y | C | C | C | A | C | T | R | C | A | G | T | A | C | Y | G | G | (-),A | H2    | N     | - | - |
| C19 | G | T | C | C | C | A | C | T | G | C | A | G | T | A | C | Y | G | G | (-),A | H2    | N     | - | - |
| C21 | G | Y | C | M | C | A | C | T | G | C | A | G | T | A | C | Y | G | G | (-),A | H2    | N     | - | - |
| C23 | G | Y | C | C | C | A | C | T | G | C | A | G | T | A | C | Y | G | G | (-),A | H2    | N     | - | - |
| C32 | G | T | C | C | C | A | C | T | G | C | A | G | T | A | C | Y | G | G | (-),A | H2    | N     | - | - |
| C34 | G | Y | C | C | C | A | C | T | G | C | A | G | T | A | C | Y | G | G | (-),A | H2    | N     | - | - |
| C35 | G | Y | C | C | C | A | C | T | G | C | A | G | T | A | C | Y | G | G | (-),A | H2    | N     | - | - |
| C36 | G | Y | C | C | C | A | C | T | G | C | A | R | T | A | C | Y | G | G | (-),A | H2    | N     | - | - |
| C37 | G | Y | C | C | C | A | C | T | G | C | A | G | T | A | C | Y | G | G | (-),A | H2    | N     | - | - |
| C03 | G | T | C | C | C | A | C | T | G | C | W | G | T | A | C | Y | G | G | (-),A | H2    | N     | - | - |
| C41 | G | T | C | C | C | A | C | T | G | C | A | G | T | A | C | Y | G | G | (-),A | H2    | N     | - | - |
| C04 | G | Y | C | C | C | A | C | T | R | C | A | G | T | A | C | Y | G | G | (-),A | H2    | N     | - | - |
| C09 | G | Y | C | C | C | A | C | T | R | C | A | G | T | A | C | Y | G | G | (-),A | H2    | N     | - | - |
| H10 | G | Y | C | C | C | A | C | T | R | C | A | G | T | A | C | Y | G | G | (-),A | H2    | N     | - | - |
| H11 | G | Y | C | C | C | A | C | T | R | C | A | G | T | A | C | Y | G | G | (-),A | H2    | N     | - | - |
| H12 | G | Y | C | C | C | A | C | T | R | C | A | G | T | A | C | Y | G | G | (-),A | H2    | N     | - | - |
| H24 | G | Y | C | M | C | A | C | T | G | C | A | G | T | A | C | Y | G | G | (-),A | H2    | N     | - | - |
| H29 | G | Y | C | M | C | A | C | T | G | C | A | G | T | A | C | Y | G | G | (-),A | H2    | N     | - | - |
| H33 | G | Y | C | C | C | A | C | T | R | C | A | G | T | A | C | Y | G | G | (-),A | H2    | N     | - | - |

|     |   |   |   |   |   |   |   |   |   |   |   |   |   |   |   |   |   |   |         |    |    |   |   |
|-----|---|---|---|---|---|---|---|---|---|---|---|---|---|---|---|---|---|---|---------|----|----|---|---|
| H34 | G | Y | C | C | C | A | C | T | R | C | A | G | T | A | C | Y | G | G | (-),A   | H2 | N  | - | - |
| H40 | G | Y | C | C | C | A | C | T | R | C | A | G | T | A | C | Y | G | G | (-),A   | H2 | N  | - | - |
| H42 | G | Y | C | C | C | A | C | T | R | C | A | G | T | A | C | Y | G | G | (-),A   | H2 | N  | - | - |
| H47 | G | T | C | C | C | A | C | T | G | C | A | G | T | A | C | Y | G | G | (-),A   | H2 | N  | - | - |
| C10 | G | Y | C | C | C | A | C | T | G | C | A | G | T | A | C | C | G | G | A,A     | H2 | H2 | - | - |
| H16 | G | T | C | C | C | A | C | T | G | C | A | G | T | A | C | C | G | G | A,A     | H2 | H2 | - | - |
| H07 | G | T | C | C | C | A | C | T | G | C | A | G | T | A | C | Y | G | G | A,A     | H2 | H3 | - | - |
| H09 | G | Y | C | C | C | A | C | T | G | C | A | G | T | A | C | Y | G | G | A,A     | H2 | H3 | - | - |
| C38 | G | C | C | C | C | A | C | T | G | C | A | G | T | A | C | T | S | G | (-),A   | H3 | N  | - | - |
| A20 | G | Y | C | C | C | A | C | T | G | C | A | G | T | A | C | T | G | G | (-),A   | H3 | N  | - | - |
| A24 | G | T | C | C | C | A | C | T | G | C | A | G | T | A | C | T | G | G | (-),A   | H3 | N  | - | - |
| A26 | G | T | C | C | C | A | C | T | G | C | A | G | T | A | C | T | G | G | (-),A   | H3 | N  | - | - |
| A37 | G | Y | C | C | C | A | C | T | G | C | A | G | T | A | C | T | G | G | (-),A   | H3 | N  | - | - |
| A03 | G | Y | C | C | C | A | C | T | G | C | A | G | T | A | C | T | G | G | (-),A   | H3 | N  | - | - |
| A44 | G | Y | C | C | C | A | C | T | G | C | A | G | T | A | C | T | G | G | (-),A   | H3 | N  | - | - |
| C01 | G | Y | C | C | C | A | C | T | G | C | A | G | T | A | C | T | G | G | (-),A   | H3 | N  | - | - |
| C26 | G | C | C | C | C | A | C | T | G | C | A | G | T | A | C | T | G | G | (-),A   | H3 | N  | - | - |
| H23 | G | C | C | C | C | A | C | T | G | C | A | G | T | A | C | T | G | G | (-),A   | H3 | N  | - | - |
| H32 | G | Y | C | C | C | A | C | T | R | C | A | G | T | A | C | T | G | G | (-),A   | H3 | N  | - | - |
| H38 | G | C | C | C | C | A | C | T | R | C | A | G | T | A | C | T | G | G | (-),A   | H3 | N  | - | - |
| H03 | G | C | C | C | C | A | C | T | R | C | A | G | T | A | C | T | G | G | (-),A   | H3 | N  | - | - |
| H43 | G | C | C | C | C | A | C | T | R | C | A | G | T | A | C | T | G | G | (-),A   | H3 | N  | - | - |
| H44 | G | Y | C | M | C | A | C | T | G | C | A | G | T | A | C | T | G | G | (-),A   | H3 | N  | - | - |
| C29 | G | Y | C | C | C | R | C | T | G | C | A | G | T | A | C | Y | G | G | (-),(-) | N  | N  | - | - |
| H26 | G | C | C | M | C | A | C | T | G | C | A | G | T | A | C | T | G | G | (-),(-) | N  | N  | - | - |
| A41 | G | Y | C | C | C | A | C | T | G | C | A | G | T | A | C | T | N | G | (-),(-) | N  | N  | - | - |
| A10 | G | C | C | C | C | A | C | T | R | C | A | G | T | A | C | T | S | G | (-),(-) | N  | N  | - | - |
| A01 | G | Y | C | C | C | A | C | T | G | C | A | G | T | A | C | T | S | G | (-),(-) | N  | N  | - | - |
| A27 | G | C | C | C | C | A | C | Y | G | C | A | G | T | A | C | T | S | G | (-),(-) | N  | N  | - | - |
| A39 | G | Y | C | C | C | A | C | T | G | C | A | G | T | A | C | T | S | G | (-),(-) | N  | N  | - | - |
| A42 | G | Y | C | C | C | A | C | T | G | C | A | G | T | A | C | T | S | G | (-),(-) | N  | N  | - | - |
| A47 | G | C | C | C | C | A | C | T | R | C | A | G | T | A | C | T | S | G | (-),(-) | N  | N  | - | - |
| A05 | G | C | C | C | C | A | C | T | R | C | A | G | T | A | C | T | S | G | (-),(-) | N  | N  | - | - |
| C24 | G | Y | C | C | C | A | C | T | G | C | A | G | T | A | C | T | S | G | (-),(-) | N  | N  | - | - |
| C02 | G | C | C | M | C | A | C | T | G | C | A | G | T | A | C | T | S | G | (-),(-) | N  | N  | - | - |
| C39 | G | C | C | C | C | A | C | T | R | C | A | G | T | A | C | T | S | G | (-),(-) | N  | N  | - | - |
| C40 | G | C | C | C | C | A | C | T | R | C | A | G | T | A | C | T | S | G | (-),(-) | N  | N  | - | - |
| C43 | G | Y | C | C | C | A | C | T | G | C | A | G | T | A | C | T | S | G | (-),(-) | N  | N  | - | - |
| H27 | G | Y | C | C | C | A | C | T | G | C | W | G | T | A | C | T | S | G | (-),(-) | N  | N  | - | - |
| H30 | G | C | C | C | C | A | C | T | R | C | A | G | T | A | C | T | S | G | (-),(-) | N  | N  | - | - |
| H39 | G | Y | C | C | C | A | C | T | G | C | A | G | T | A | C | T | S | G | (-),(-) | N  | N  | - | - |
| H50 | G | Y | C | C | C | A | C | T | G | C | A | G | T | A | C | T | S | G | (-),(-) | N  | N  | - | - |
| H46 | G | Y | C | C | C | A | C | T | G | C | A | G | T | A | C | T | C | G | (-),(-) | N  | N  | - | - |

|     |   |   |   |   |   |   |   |   |   |   |   |   |   |   |   |   |   |   |         |   |   |   |   |
|-----|---|---|---|---|---|---|---|---|---|---|---|---|---|---|---|---|---|---|---------|---|---|---|---|
| A49 | G | Y | C | C | C | A | C | T | G | C | A | G | T | A | C | T | S | G | (-),(-) | N | N | - | - |
| A14 | G | C | C | C | Y | A | C | T | G | C | A | G | T | A | C | T | G | G | (-),(-) | N | N | - | - |
| A15 | G | Y | C | C | C | R | C | T | G | C | A | G | T | A | C | T | G | G | (-),(-) | N | N | - | - |
| A18 | G | C | C | M | C | A | C | Y | G | C | A | G | T | A | C | T | G | G | (-),(-) | N | N | - | - |
| A19 | G | C | C | C | Y | A | C | Y | G | C | A | G | T | A | C | T | G | G | (-),(-) | N | N | - | - |
| A21 | G | C | C | C | Y | A | C | T | G | C | A | G | T | A | C | T | G | G | (-),(-) | N | N | - | - |
| A32 | G | Y | C | C | C | A | C | T | G | C | A | G | T | A | C | T | G | G | (-),(-) | N | N | - | - |
| A48 | G | T | C | C | C | A | C | T | G | C | A | G | T | A | C | T | G | G | (-),(-) | N | N | - | - |
| A09 | G | Y | C | C | C | A | C | Y | G | C | A | G | T | A | C | T | G | G | (-),(-) | N | N | - | - |
| C12 | G | Y | C | C | C | R | C | T | G | C | A | G | T | A | C | T | G | G | (-),(-) | N | N | - | - |
| C13 | G | Y | C | C | C | A | C | T | R | C | A | G | T | A | C | T | G | G | (-),(-) | N | N | - | - |
| C14 | G | C | C | C | C | R | C | T | G | C | A | G | T | A | C | T | G | G | (-),(-) | N | N | - | - |
| C07 | G | C | C | C | C | A | C | T | G | C | A | G | T | A | C | T | G | G | (-),(-) | N | N | - | - |
| C15 | G | C | C | C | C | A | C | T | A | C | A | G | T | A | C | T | G | G | (-),(-) | N | N | - | - |
| C20 | G | Y | C | C | C | A | C | T | G | C | A | R | T | A | C | T | G | G | (-),(-) | N | N | - | - |
| C22 | G | Y | C | C | C | A | C | T | G | C | W | G | T | A | C | T | G | G | (-),(-) | N | N | - | - |
| C25 | G | Y | C | C | C | A | C | T | R | C | A | G | T | A | C | T | G | G | (-),(-) | N | N | - | - |
| C27 | G | C | C | C | C | R | C | T | G | C | A | G | T | A | C | T | G | G | (-),(-) | N | N | - | - |
| C30 | G | Y | C | C | C | A | C | T | R | C | A | G | T | A | C | T | G | G | (-),(-) | N | N | - | - |
| C33 | G | C | C | C | C | A | C | T | A | C | A | G | T | A | C | T | G | G | (-),(-) | N | N | - | - |
| C42 | G | Y | C | C | C | A | C | T | G | C | A | R | T | A | C | T | G | G | (-),(-) | N | N | - | - |
| C44 | G | Y | C | C | C | R | C | T | G | C | A | G | T | A | C | T | G | G | (-),(-) | N | N | - | - |
| C45 | G | C | C | C | C | A | C | T | A | C | A | G | T | A | C | T | G | G | (-),(-) | N | N | - | - |
| C46 | G | C | C | C | C | R | C | T | G | C | A | G | T | A | C | T | G | G | (-),(-) | N | N | - | - |
| C48 | G | Y | C | C | C | A | C | T | R | C | A | G | T | A | C | T | G | G | (-),(-) | N | N | - | - |
| C49 | G | Y | C | C | C | R | C | T | G | C | A | G | T | A | C | T | G | G | (-),(-) | N | N | - | - |
| C05 | G | Y | C | C | C | A | C | T | G | C | A | G | T | A | C | T | G | G | (-),(-) | N | N | - | - |
| H13 | G | Y | C | C | C | A | C | T | G | C | A | G | T | A | C | T | G | G | (-),(-) | N | N | - | - |
| H14 | G | C | C | C | C | A | C | T | A | C | A | G | T | A | C | T | G | G | (-),(-) | N | N | - | - |
| H15 | G | C | C | C | C | A | C | T | G | C | A | G | T | A | C | T | G | G | (-),(-) | N | N | - | - |
| H18 | G | Y | C | C | C | A | C | T | R | C | A | G | T | A | C | T | G | G | (-),(-) | N | N | - | - |
| H19 | G | Y | C | C | C | A | C | T | R | C | A | G | T | A | C | T | G | G | (-),(-) | N | N | - | - |
| H01 | G | Y | C | M | C | A | C | T | G | C | W | G | T | A | C | T | G | G | (-),(-) | N | N | - | - |
| H21 | G | C | C | C | C | A | C | T | A | C | A | G | T | A | C | T | G | G | (-),(-) | N | N | - | - |
| H22 | G | C | C | C | C | A | C | T | A | C | A | G | T | A | C | T | G | G | (-),(-) | N | N | - | - |
| H25 | G | C | C | C | C | A | C | T | A | C | A | G | T | A | C | T | G | G | (-),(-) | N | N | - | - |
| H28 | G | Y | C | C | C | A | C | T | G | C | A | G | T | A | C | T | G | G | (-),(-) | N | N | - | - |
| H31 | G | C | C | C | C | A | C | T | R | C | A | G | T | A | C | T | G | G | (-),(-) | N | N | - | - |
| H35 | G | Y | C | C | C | A | C | T | R | C | A | G | T | A | C | T | G | G | (-),(-) | N | N | - | - |
| H45 | G | Y | C | C | C | A | C | T | R | C | A | G | T | A | C | T | G | G | (-),(-) | N | N | - | - |
| H48 | G | C | C | C | C | A | C | T | A | C | A | G | T | A | C | T | G | G | (-),(-) | N | N | - | - |
| H49 | G | C | C | C | C | A | C | T | R | C | A | G | T | A | C | T | G | G | (-),(-) | N | N | - | - |
| H04 | G | C | C | M | C | A | C | T | G | C | A | G | T | A | C | T | G | G | (-),(-) | N | N | - | - |

|           |        |      |        |       |      |       |       |       |      |       |       |       |       |       |        |      |       |      |         |   |   |   |   |
|-----------|--------|------|--------|-------|------|-------|-------|-------|------|-------|-------|-------|-------|-------|--------|------|-------|------|---------|---|---|---|---|
| H05       | G      | C    | C      | C     | C    | A     | C     | T     | A    | C     | A     | G     | T     | A     | C      | T    | G     | G    | (-),(-) | N | N | - | - |
| H06       | G      | T    | C      | C     | C    | A     | C     | T     | G    | C     | A     | G     | T     | A     | C      | T    | G     | G    | (-),(-) | N | N | - | - |
| H08       | G      | C    | C      | C     | C    | A     | C     | T     | A    | C     | A     | G     | T     | A     | C      | T    | G     | G    | (-),(-) | N | N | - | - |
| frequency | 0.0067 | 0.35 | 0.0067 | 0.037 | 0.02 | 0.027 | 0.023 | 0.013 | 0.18 | 0.017 | 0.013 | 0.001 | 0.117 | 0.117 | 0.0467 | 0.21 | 0.097 | 0.04 | 0.32    |   |   |   |   |



**Supp. Table S4. H1 hybrid allele frequencies in CRC patients**

| Cancer and control cohorts          | Carrier frequency |            |            |
|-------------------------------------|-------------------|------------|------------|
| <i>PMS2</i> -deficient CRC patients | 2/22 (9%)         | ] P = 0.58 | ] P = 0.68 |
| Sporadic CRC patients               | 19/142 (13%)      |            |            |
| Age and sex matched controls        | 38/267 (14%)      |            |            |

CRC = colorectal cancer
